# Supplementary material for: Amino acid substitutions at the HIV-1 transframe region significantly impair virus infectivity
Source: PubMed Central journal article supplement (PMC8794111; doi:10.1371/journal.pone.0262477), 2022-01-27

# Original uncropped blot Fig. 2B

medium

cell

anti-RT

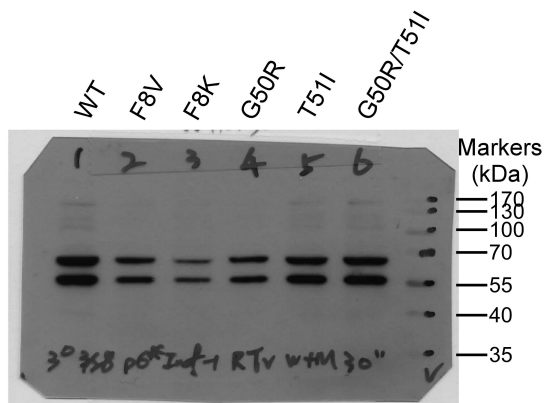

anti-p24 (CA)

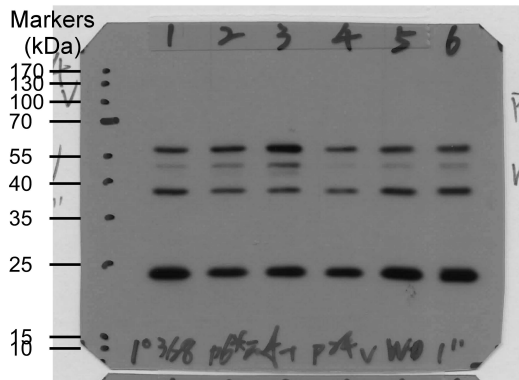

anti-β actin

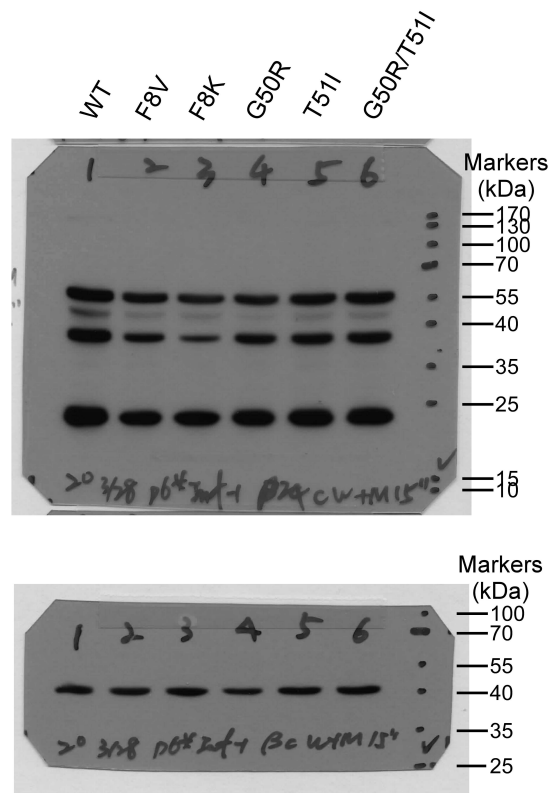

# Original uncropped blot Fig. 2C

medium

cell

WT E19V Q20S E19I/Q20A E19I/Q20A/T21S E19I/Q20A/T21S/S25G E19V/Q20A/T21P S25R P26A S25C/P26T

anti-RT

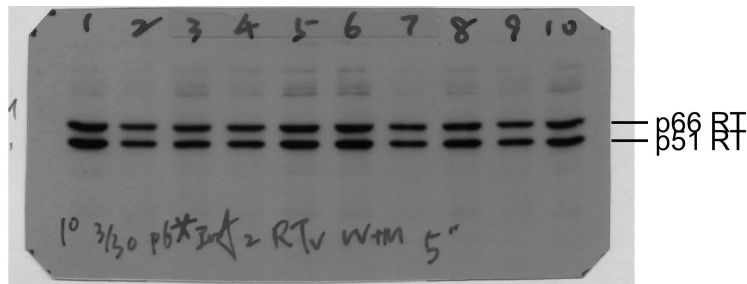

anti-p24 (CA)

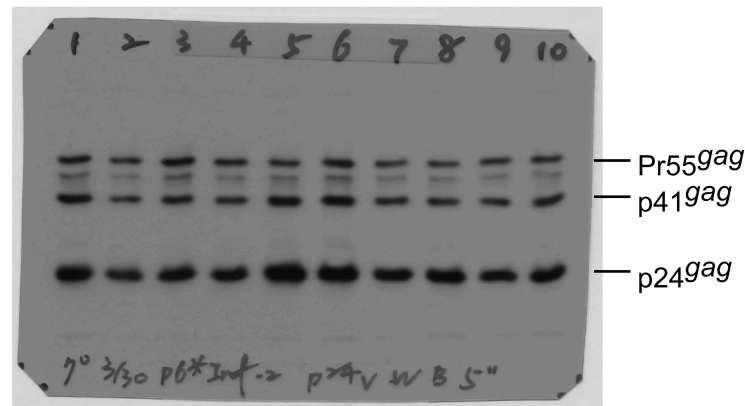

anti-β actin

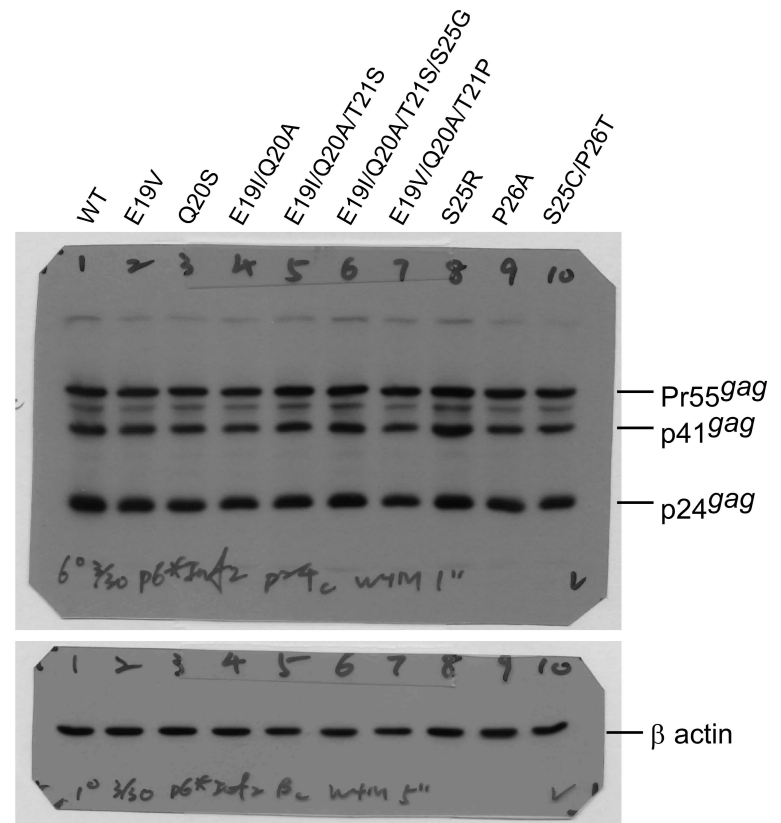

# Original uncropped blot Fig. 3A

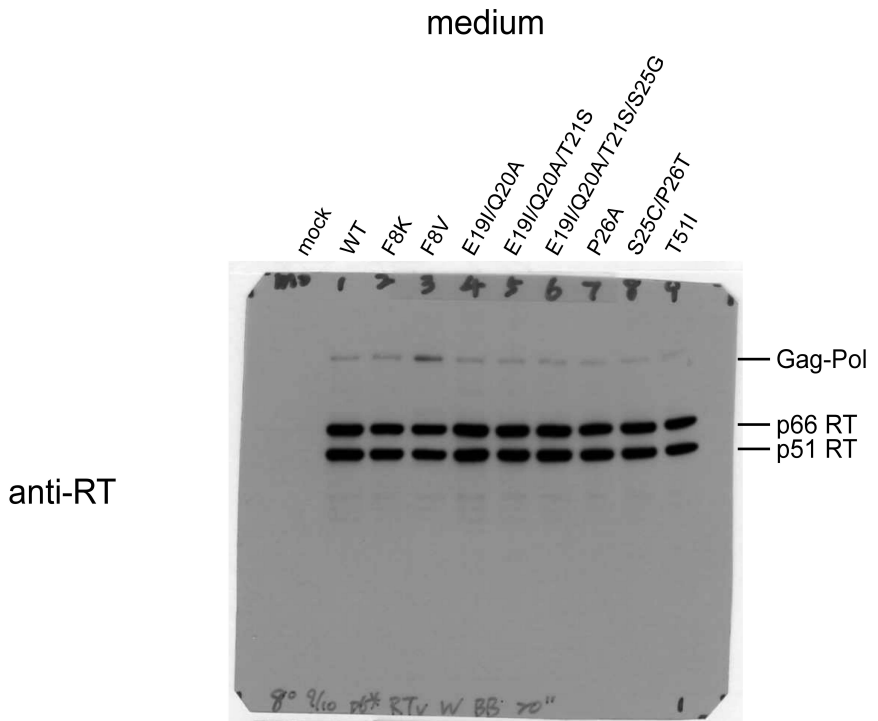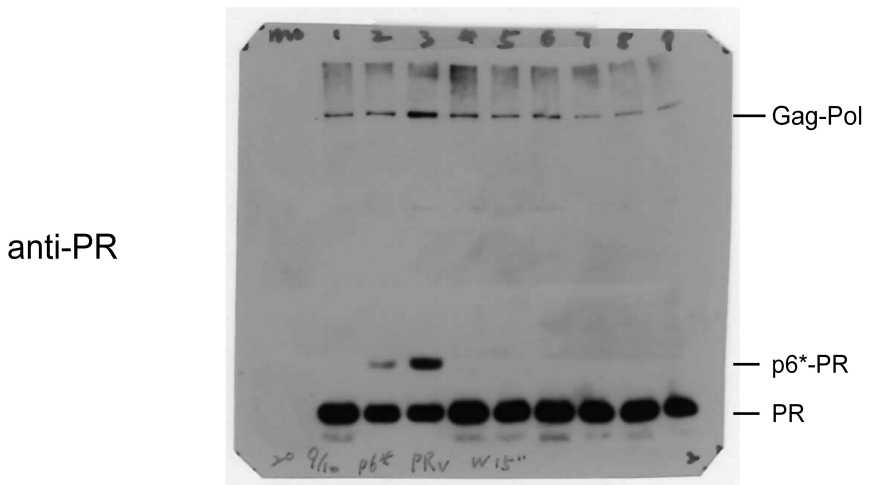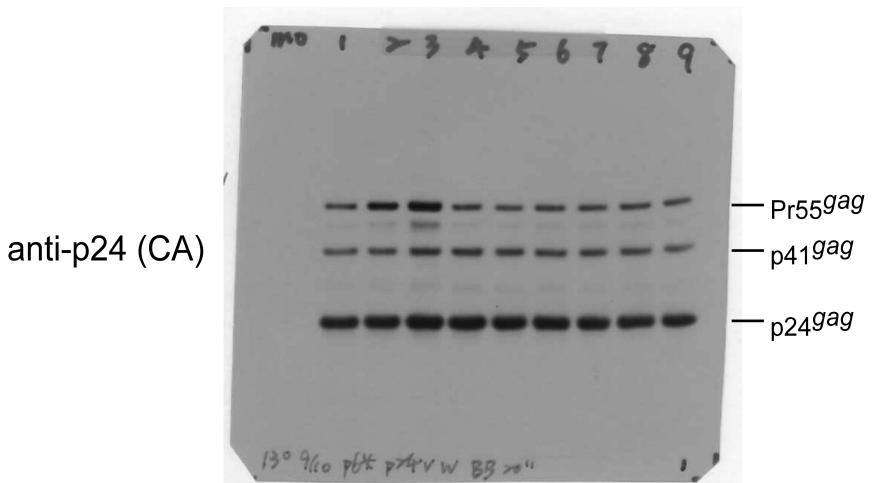

# Original uncropped blot Fig. 4

medium

cell

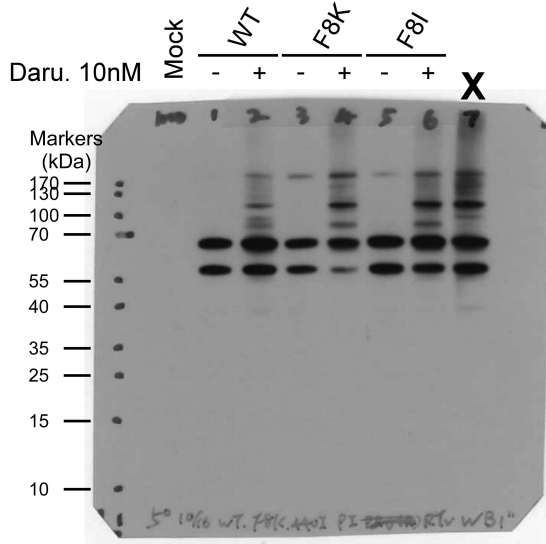

anti-RT

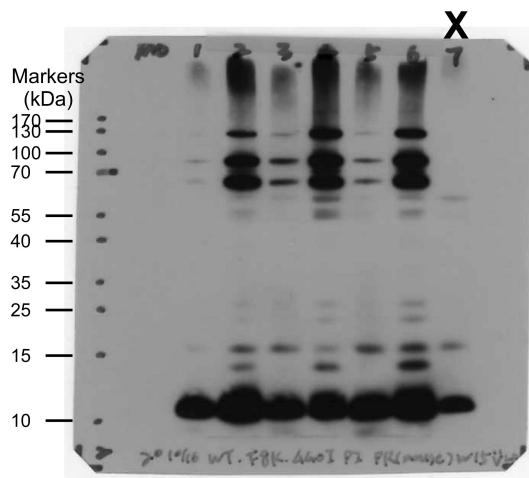

anti-PR

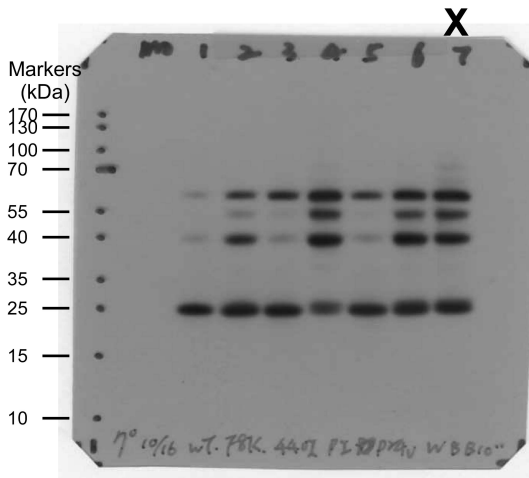

anti-p24 (CA)

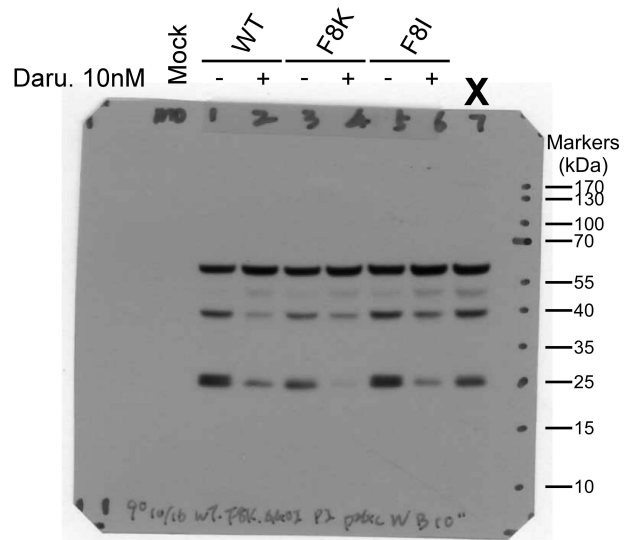

anti-β actin

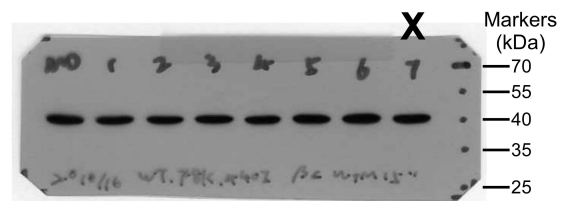

# Original uncropped blot Fig. 6A

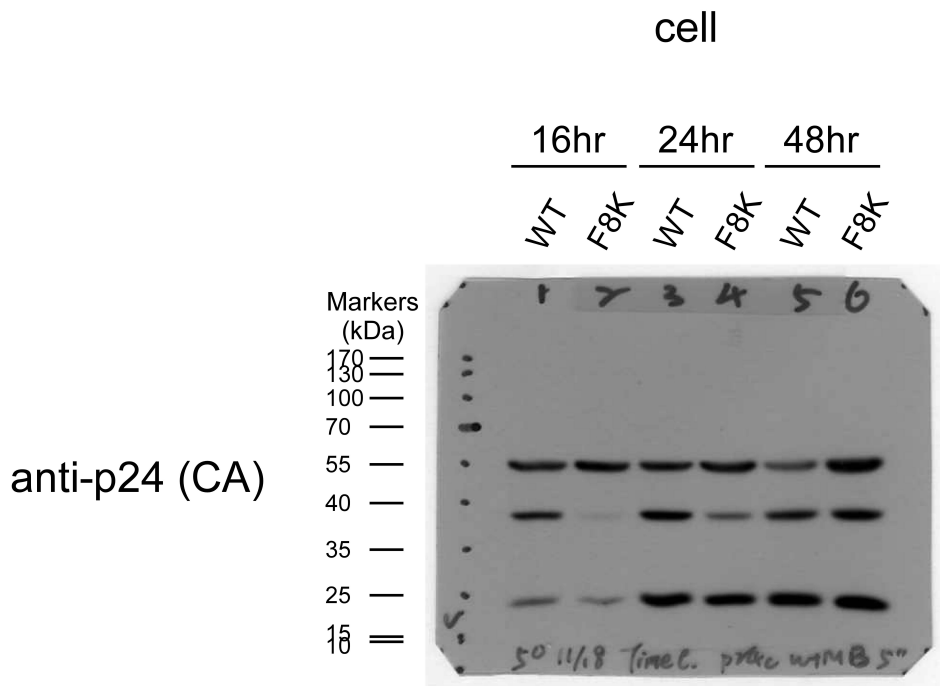

Supplement: pone.0262477.s001.pdf [file pone.0262477.s001.pdf]
